# Supplementary material for: Multiscale understanding of electric polarization in poly(vinylidene fluoride)-based ferroelectric polymers
Source: Royal Society of Chemistry journal article supplement (doi:10.1039/d0tc04310a), 2020-01-01
Supplement: d0tc04310a1.pdf [file d0tc04310a1.pdf]

## Supporting Information

### Multiscale understanding of electric polarization in poly(vinylidene fluoride)- based ferroelectric polymers

*Nan Meng<sup>1,2</sup>, Xintong Ren<sup>2</sup>, Xiaojing Zhu<sup>2</sup>, Jiyue Wu<sup>2</sup>, Bin Yang<sup>3\*</sup>, Feng Gao<sup>4</sup>, Han Zhang<sup>2</sup>,  
Yaozu Liao<sup>1</sup>, Emiliano Bilotti<sup>2</sup>, Michael J. Reece<sup>2</sup>, Haixue Yan<sup>2\*</sup>*

<sup>1</sup>State Key Laboratory for Modification of Chemical Fibers and Polymer Materials, College of Materials Science and Engineering, Donghua University, Shanghai, 201620, PR China

<sup>2</sup>School of Engineering and Materials Science, Queen Mary University of London, Mile End Road, London E1 4NS, UK

<sup>3</sup>Department of Computer Science, Electronic and Electrical Engineering, Faculty of Science and Engineering, University of Chester, Chester, CH2 4NU, UK

<sup>4</sup>State Key Laboratory of Solidification Processing, School of Materials Science and Engineering, NPU-QMUL Joint Research Institute of Advanced Materials and Structure, Northwestern Polytechnical University, Xi'an, 710072, P.R. China

Email: b.yang@chester.ac.uk; h.x.yan@qmul.ac.uk

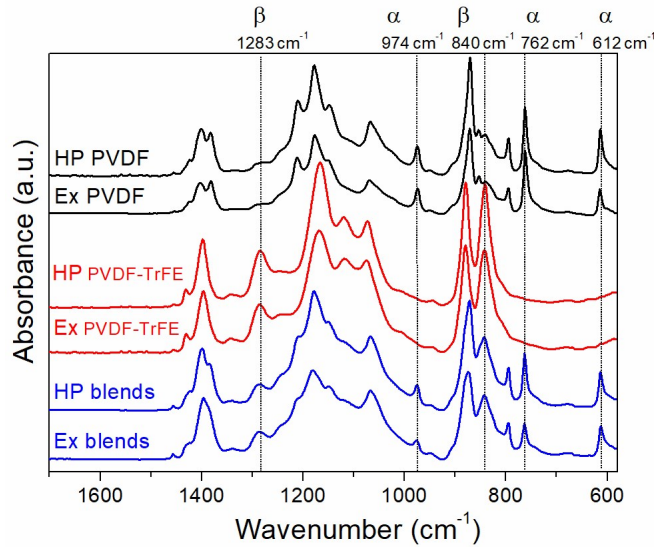

**Figure S1.** FTIR of PVDF, PVDF-TrFE and 50/50 blended films processed via melt-extrusion (Ex) and hot-compression (HP).

The hot pressed and extruded PVDF films show obvious and strong characteristic bands of  $\alpha$ -phase,  $612\text{ cm}^{-1}$ ,  $762\text{ cm}^{-1}$  and  $974\text{ cm}^{-1}$  and weak appearance of  $\beta$ -characteristic bands,  $840\text{ cm}^{-1}$  and  $1283\text{ cm}^{-1}$ , which suggests that the hot pressed and extruded PVDF films mainly crystallized into  $\alpha$ -phase. The hot pressed and extruded PVDF-TrFE films contain pure  $\beta$ -phase, concluded from the strong  $\beta$ -characteristic bands ( $840\text{ cm}^{-1}$  and  $1283\text{ cm}^{-1}$ ) and the absence of  $\alpha$ -characteristic bands ( $612\text{ cm}^{-1}$ ,  $762\text{ cm}^{-1}$  and  $974\text{ cm}^{-1}$ ). The blends show mixed bands of  $\alpha$ - and  $\beta$ -phase.

FTIR can also be used to quantitatively determine the volume fraction of  $\beta$ -phase ( $F(\beta)$ ) using the below equation<sup>1</sup> :

$$F(\beta) = \frac{A_{\beta}}{\frac{K_{\beta}}{K_{\alpha}} \times A_{\alpha} + A_{\beta}} \times 100\% \quad (1)$$

where  $A_{\alpha}$  and  $A_{\beta}$  are the absorbance of  $\alpha$ - and  $\beta$ -characteristic bands,  $762\text{ cm}^{-1}$  and  $840\text{ cm}^{-1}$ , respectively.  $K_{\alpha}$  and  $K_{\beta}$  are the absorption coefficients of bands at  $762\text{ cm}^{-1}$  and  $840\text{ cm}^{-1}$ , which

are  $6.1 \times 10^4$  cm<sup>2</sup>/mol and  $7.7 \times 10^4$  cm<sup>2</sup>/mol, respectively. The calculated values of  $F(\beta)$  are summarized in Table S1, which also includes the DSC characteristic parameters.

**Table S1.** The content of  $\beta$ -phase ( $F(\beta)$ ) and thermal characteristics of melting temperature ( $T_m$ ), Curie transition temperature ( $T_c$ ), fusion enthalpy ( $\Delta H_f$ ) and degree of crystallinity ( $\eta$ ) for pure PVDF, PVDF-TrFE and their blends prepared using melt-extrusion (Ex) and hot compression (HP).

|                   | HP<br>PVDF | Ex<br>PVDF | HP<br>PVDF-<br>TrFE | Ex<br>PVDF-<br>TrFE | HP blends                             | Ex<br>blends                          |
|-------------------|------------|------------|---------------------|---------------------|---------------------------------------|---------------------------------------|
| $F(\beta)$ (vol.) | < 10%      | < 10%      | 100%                | 100%                | 50-60%                                | 65-70%                                |
| $T_m$ (°C)        | 157±2      | 157±3      | 152±1               | 150±1               | 158±1 (PVDF)<br>148±1 (PVDF-<br>TrFE) | 158±2 (PVDF)<br>148±2 (PVDF-<br>TrFE) |
| $T_c$ (°C)        | > $T_m$    | > $T_m$    | 115±3               | 122±2               | 119±3                                 | 128±2                                 |
| $\Delta H_f$      | 41±2       | 44±3       | 25±2                | 28±2                | 28±2 (PVDF)<br>21±1 (PVDF-TrFE)       | 30±2 (PVDF)<br>22±1 (PVDF-TrFE)       |
| * $\eta$          | 39±2%      | 42±3%      | 65±6%               | 74±4%               | 27±2% (PVDF)<br>55±3% (PVDF-<br>TrFE) | 29±2% (PVDF)<br>58±3% (PVDF-<br>TrFE) |

\*The degree of crystallinity was achieved using the experimental values of  $\Delta H_f$  divided by the values of fusion enthalpy for 100% crystalline materials ( $\Delta H_f^\circ$ ), which are 104.6 J/g and 38 J/g for PVDF and PVDF-TrFE, respectively.<sup>2</sup>

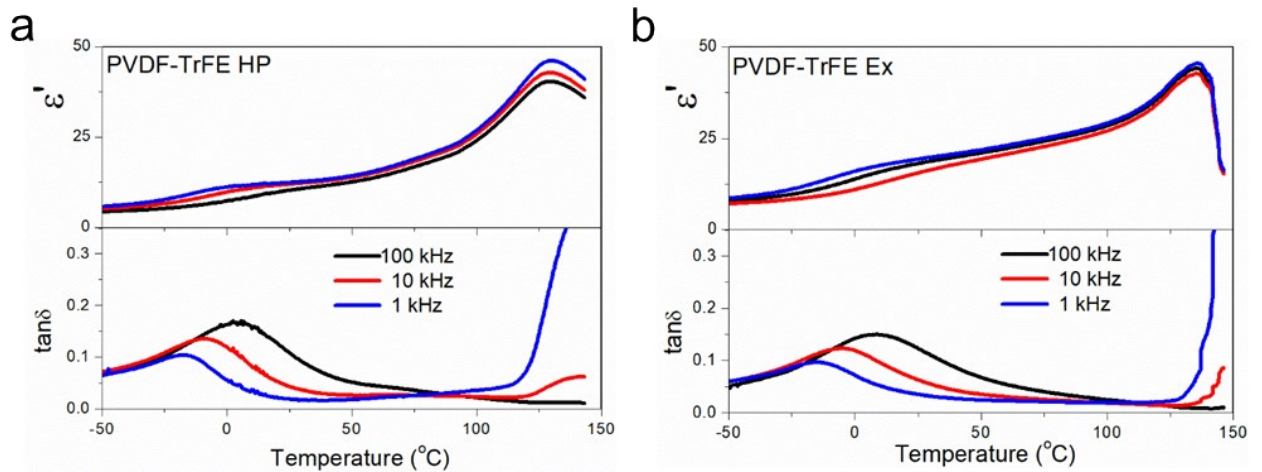

**Figure S2.** The temperature dependence of dielectric permittivity of the (a) hot pressed and (b) extruded PVDF-TrFE films.

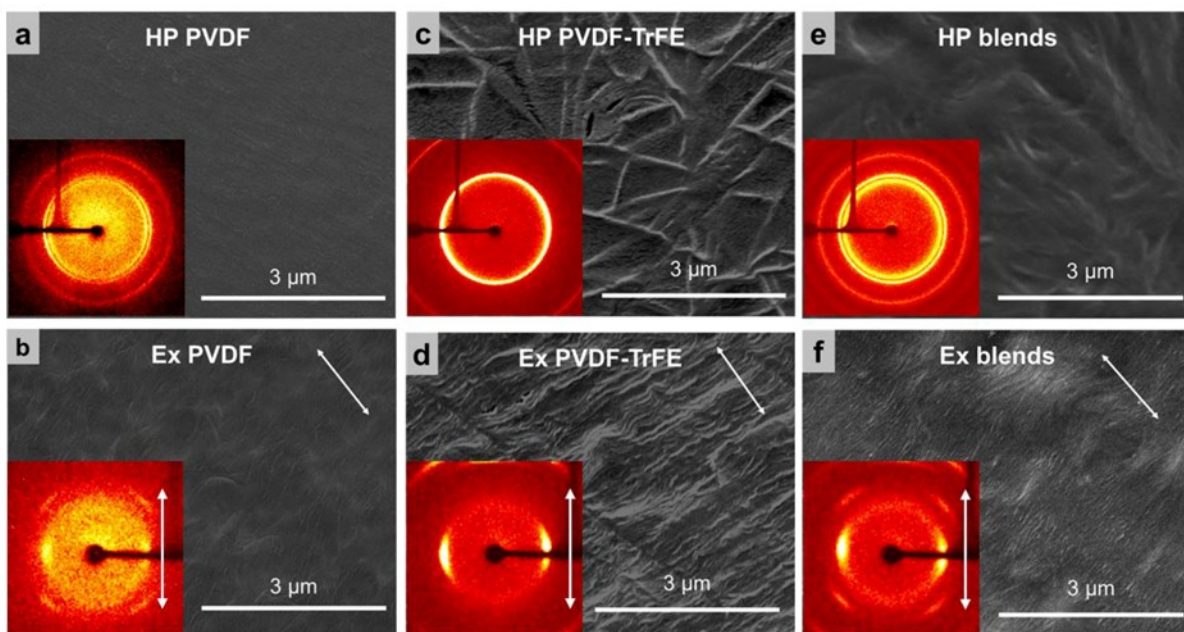

**Figure S3.** Surface SEM morphology images of samples processed using hot-compression (HP) and melt-extrusion (Ex) with the inset images of 2D-XRD ring patterns taken with an incident beam normal to the film surface: (a) HP PVDF; (b) Ex PVDF; (c) HP PVDF-TrFE; (d) Ex PVDF-TrFE; (e) HP blends and (f) Ex blends. The white arrows in SEM images and 2D-XRD ring patterns denote the direction of extrusion.

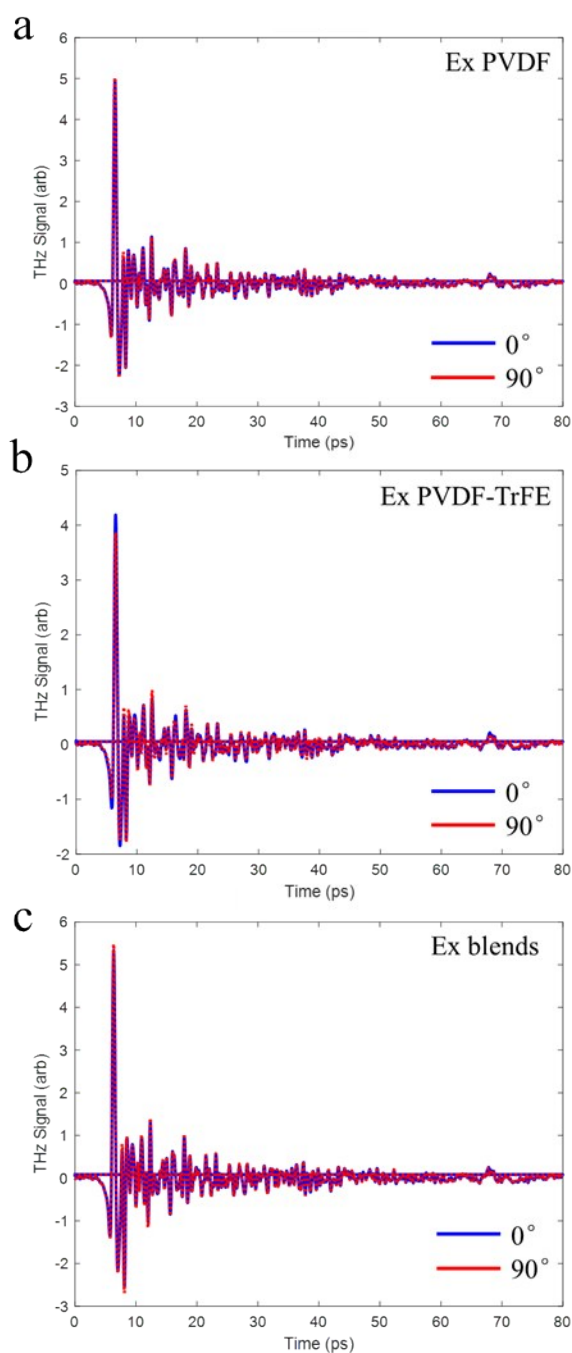

**Figure S4.** The 0° and 90° THz spectroscopy of extruded PVDF, PVDF-TrFE and their blends, which demonstrate that there is no difference in the THz-TDS spectra during the 90° rotation of samples.

#### Reference

1. Jr. R. Gregorio and M. Cestari, *Journal of Polymer Science Part B Polymer Physics*, 1994, **32**, 859-870.
2. P. Martins, A. C. Lopes and S. Lanceros-Mendez, *Progress in Polymer Science*, 2014, **39**, 683-706.
